# Supplementary material
Source: PubMed Central journal article supplement (PMC3548268)

## **Supplementary figure 1**

Summary of CVM classification in the discovery cohort (BCM1)

### Discovery cohort (n=203)

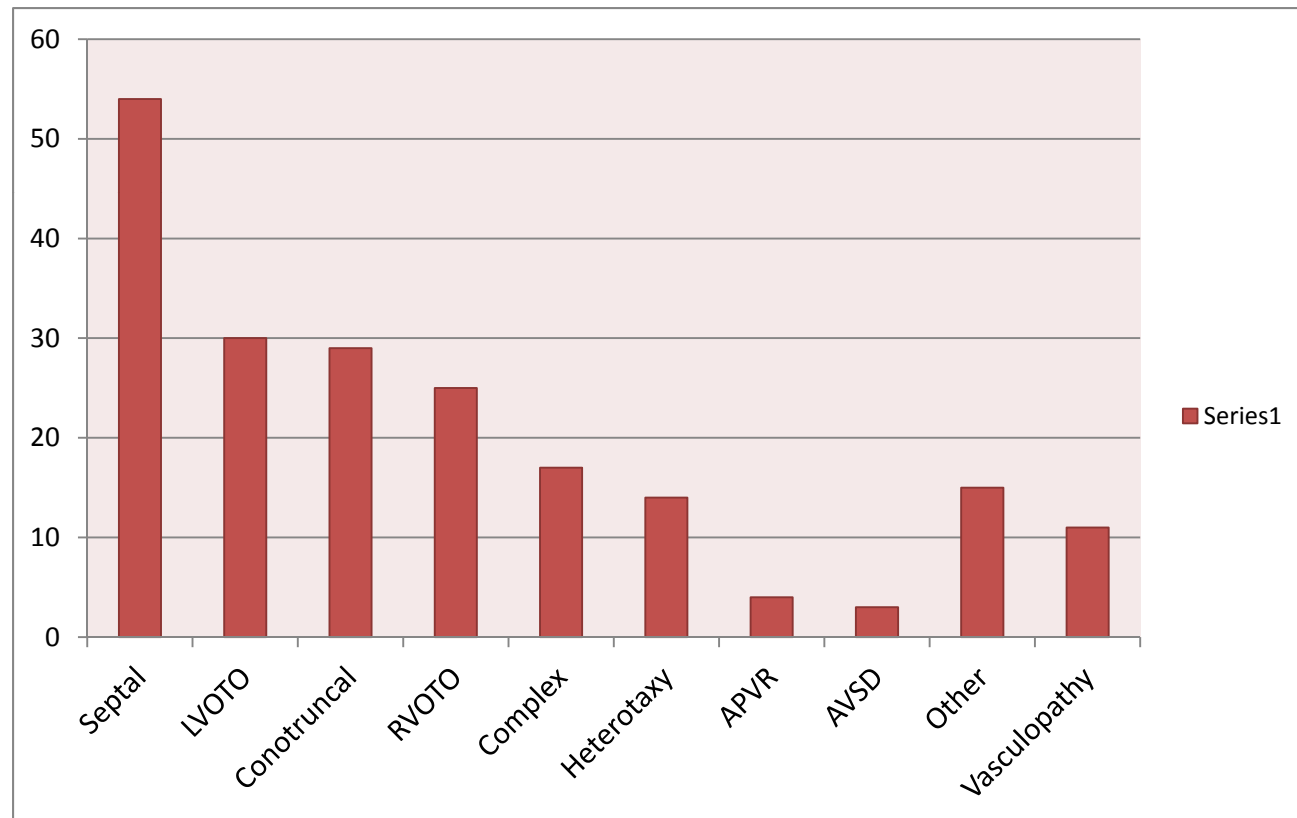

## **Supplementary figure 2**

Summary of CVM classification in the second cohort (BCM2)

### Replication cohort (n=511)

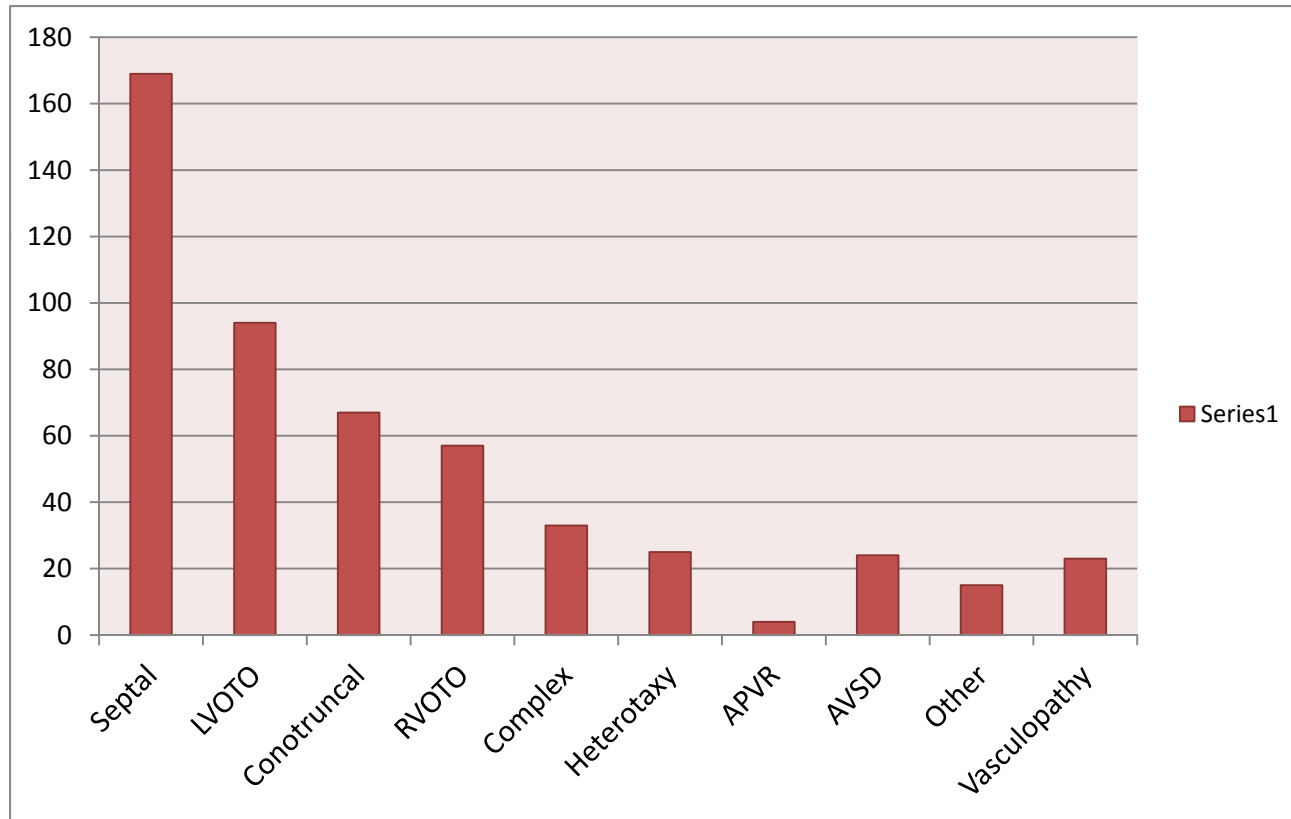

### **Supplementary figure 3**

Flowchart for the study design

BCM1 cohort  
n=203 CVM plus ECA cases, studied with  
105k genome-wide Agilent array

Primary controls  
n=872 (ECA without CVM)  
studied with 105k genome-wide Agilent array

QC and CNV calling

55 CNVs  $\geq$  50 kb with  $\leq$ 75 DGV overlap, found  
in cases and NOT observed in controls

1p36 loss (4/203)  
1q44 loss (1/203)  
2q31.3 - q32.1 loss (1/203)  
5p13.2 gain (1/203)  
8p23.1 loss (1/203)  
13q32.3 - q33.1 loss (1/203)  
16p13.1 gain (2/203)  
16q24.3 loss (1/203)  
17p13.3 loss (1/203)  
22q11.21 gain (1/203)

Second study, analyzing 55 CNV  $\geq$  50 kb

BCM2 cohort  
n=511 cases with CVM and ECA

Second control set  
n=2,011 (ECA without CVM)

16/55 CNVs seen in cases but NOT observed in controls

1q44 loss (1/511)  
2q31.3 - q32.1 loss (1/511)  
**5p13.2 gain (2/511)**  
**8p23.1 loss (2/511)**  
13q32.3 - q33.1 loss (1/511)  
**16q24.3 loss (3/511)**  
17p13.3 loss (1/511)  
**22q11.21 gain (3/511)**

Confirmation by FISH/karyotype  
and/or long range PCR

#### **Supplementary figure 4**

Principal component analysis across all cases and controls using over 10,000 oligonucleotides, illustrating that the cases and controls are matched for gender and ethnicity. Each oligonucleotide and each individual was brought to mean 0 before the decomposition. R package Corpcor was used to compute the singular value decomposition of the centered matrix. Only the first 3 projections are shown. Male controls are shown in blue and female controls are shown in pink. Cases are represented in black. Components 2 and 3 separate the ethnic groups corresponding to Caucasian non-Hispanics and White-Hispanics into approximately equal sized clusters, consistent with the known ethnicity composition of our patient population. The data show that that cases and controls are overlapping, indicating that both genders and ethnicities are well matched between these two cohorts. All cases and controls are pediatric subjects, between age 0 and 18 years.

-8 -6 -4 -2 0 2 4 6

Comp1

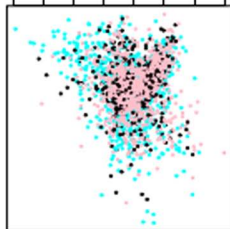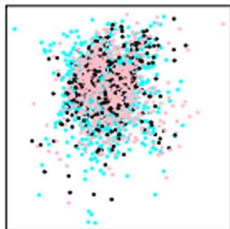

6  
4  
2  
0  
-2  
-4  
-6  
-8

Comp2

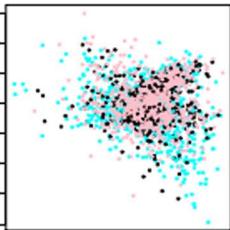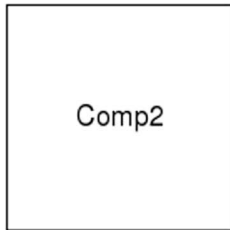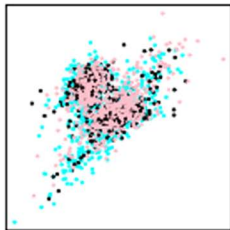

Comp3

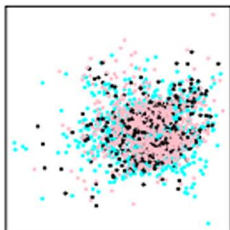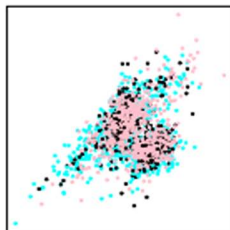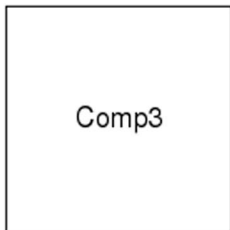



## **Supplementary figures 5 and 6**

FISH validation and *de novo* ascertainment of the enriched structural variants in cases

Child

Parent

Parent

CVM3843

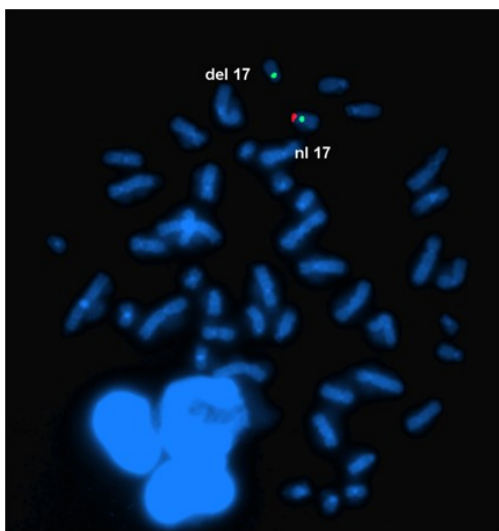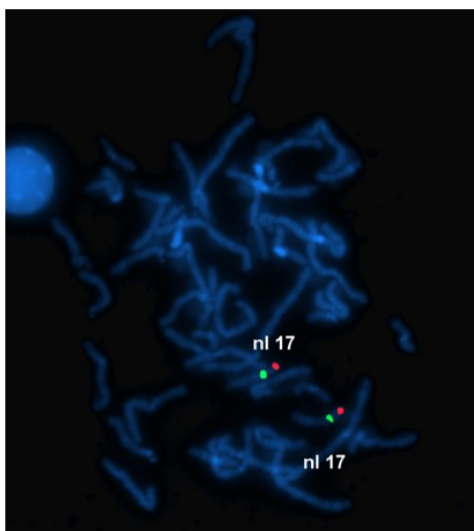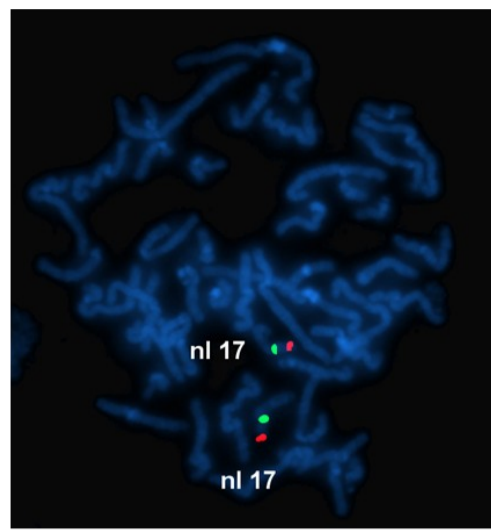

17p13.3 loss  
DN

CVM9035

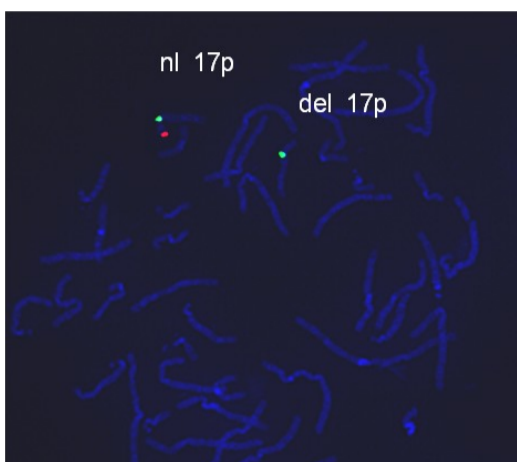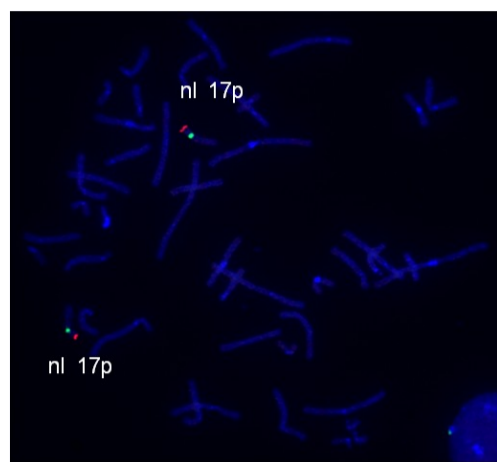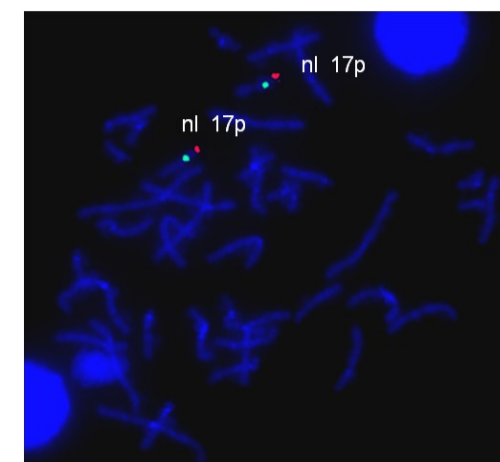

17p13.3 loss  
DN

CVM3839

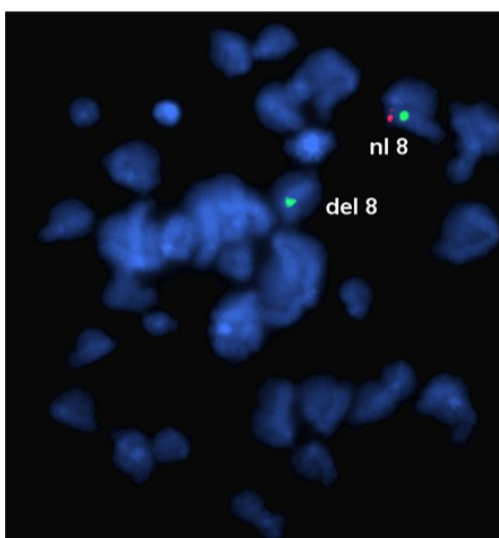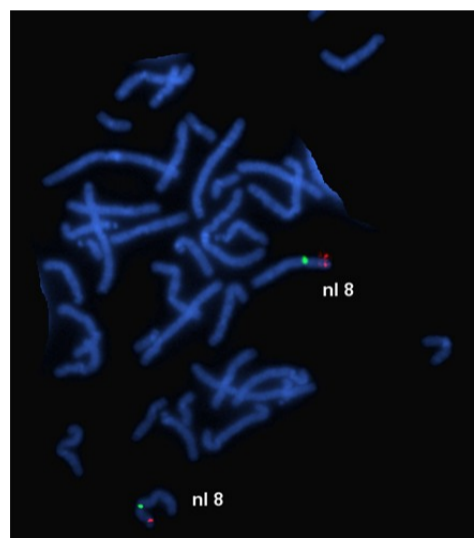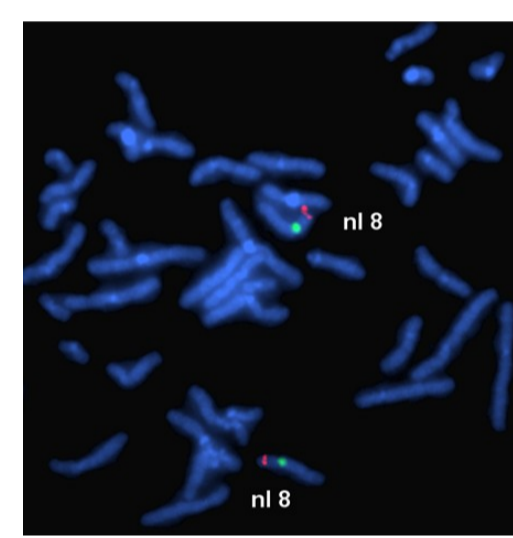

8p23 loss  
(*GATA4*)  
DN

CVM7658

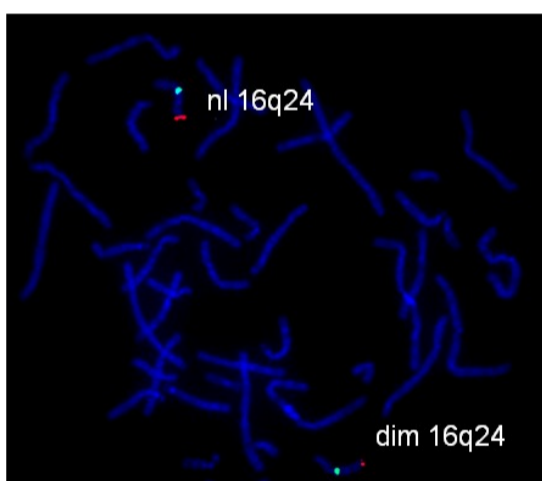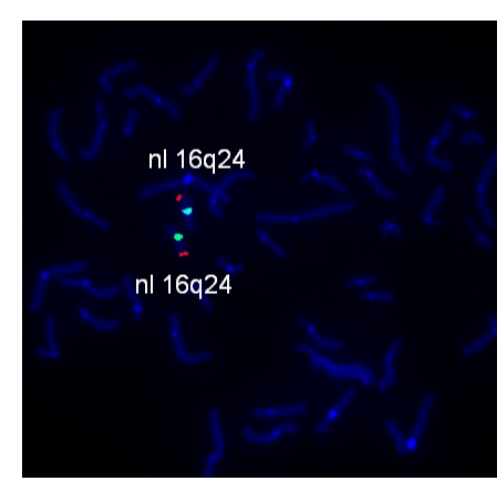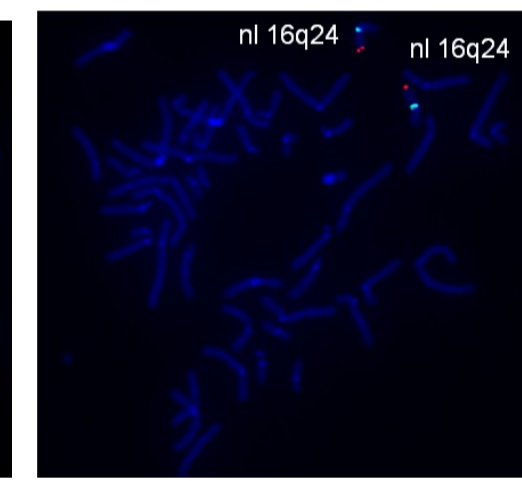

16q24.3 loss  
DN

CVM0585

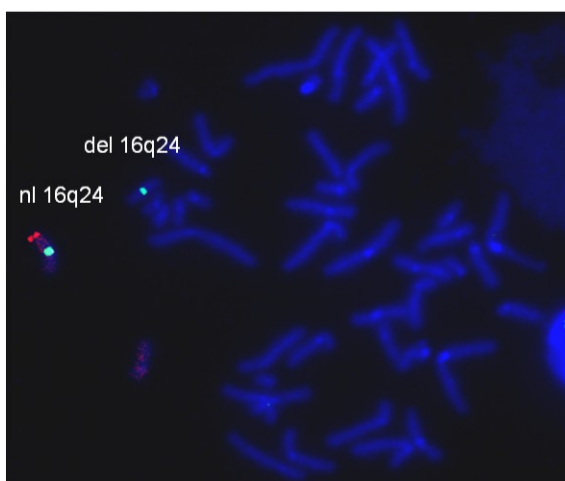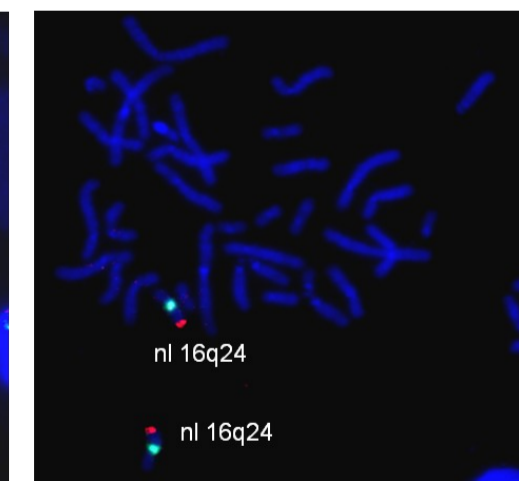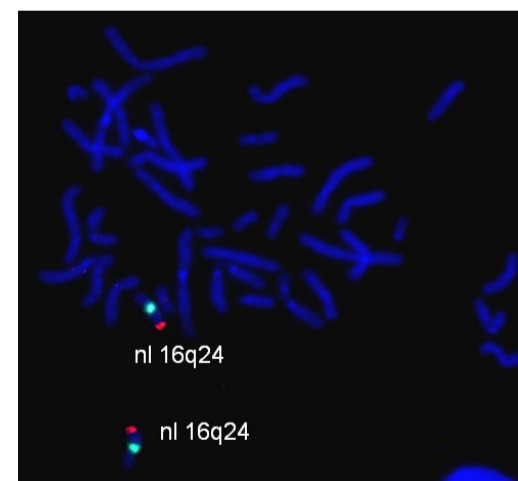

16q24.3 loss  
DN

CVM4535

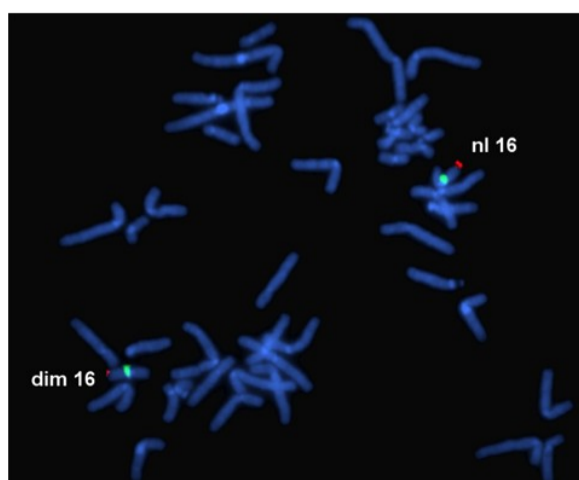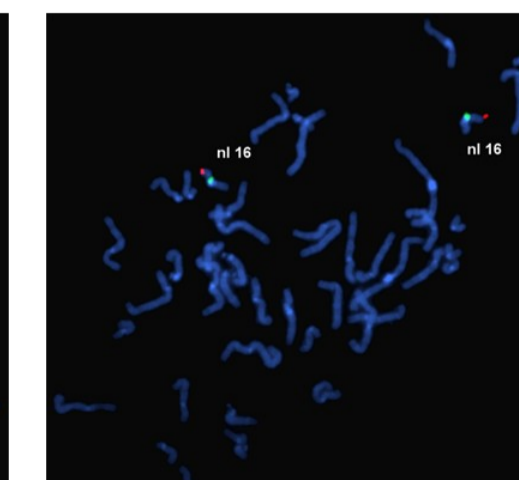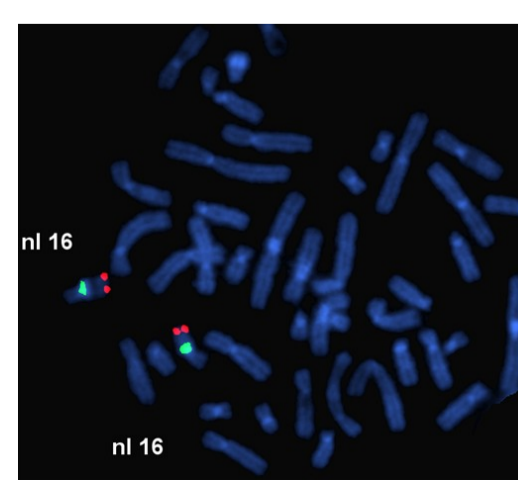

16q24.3 loss  
DN

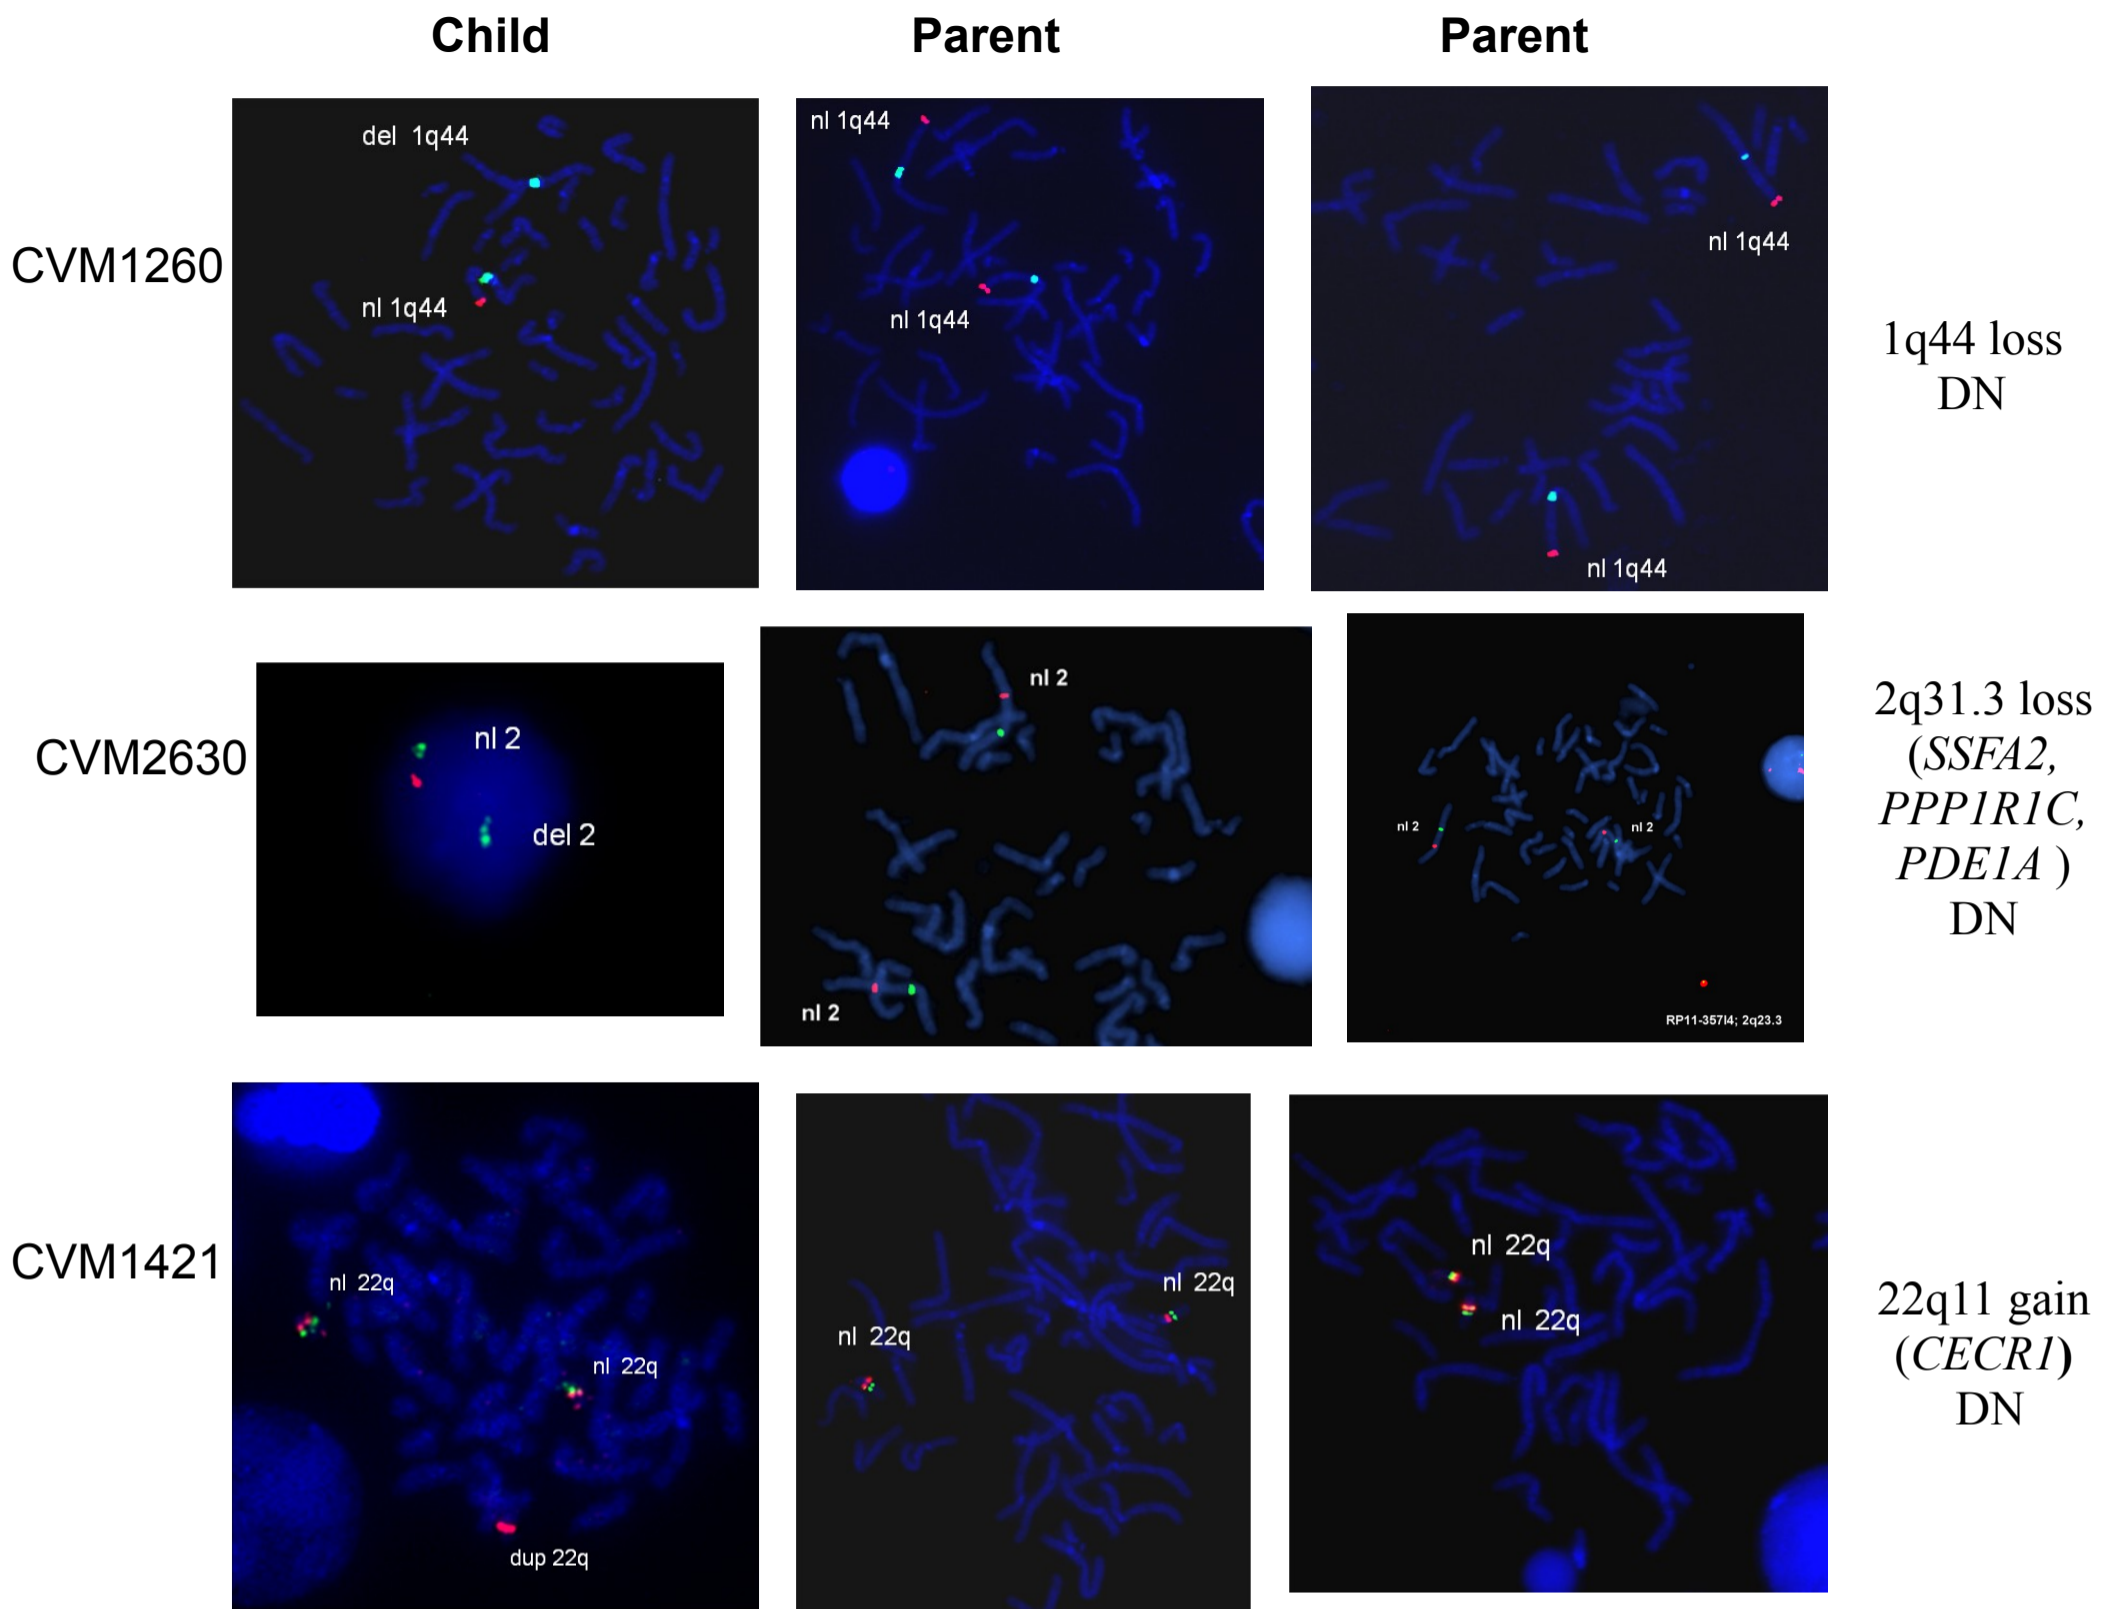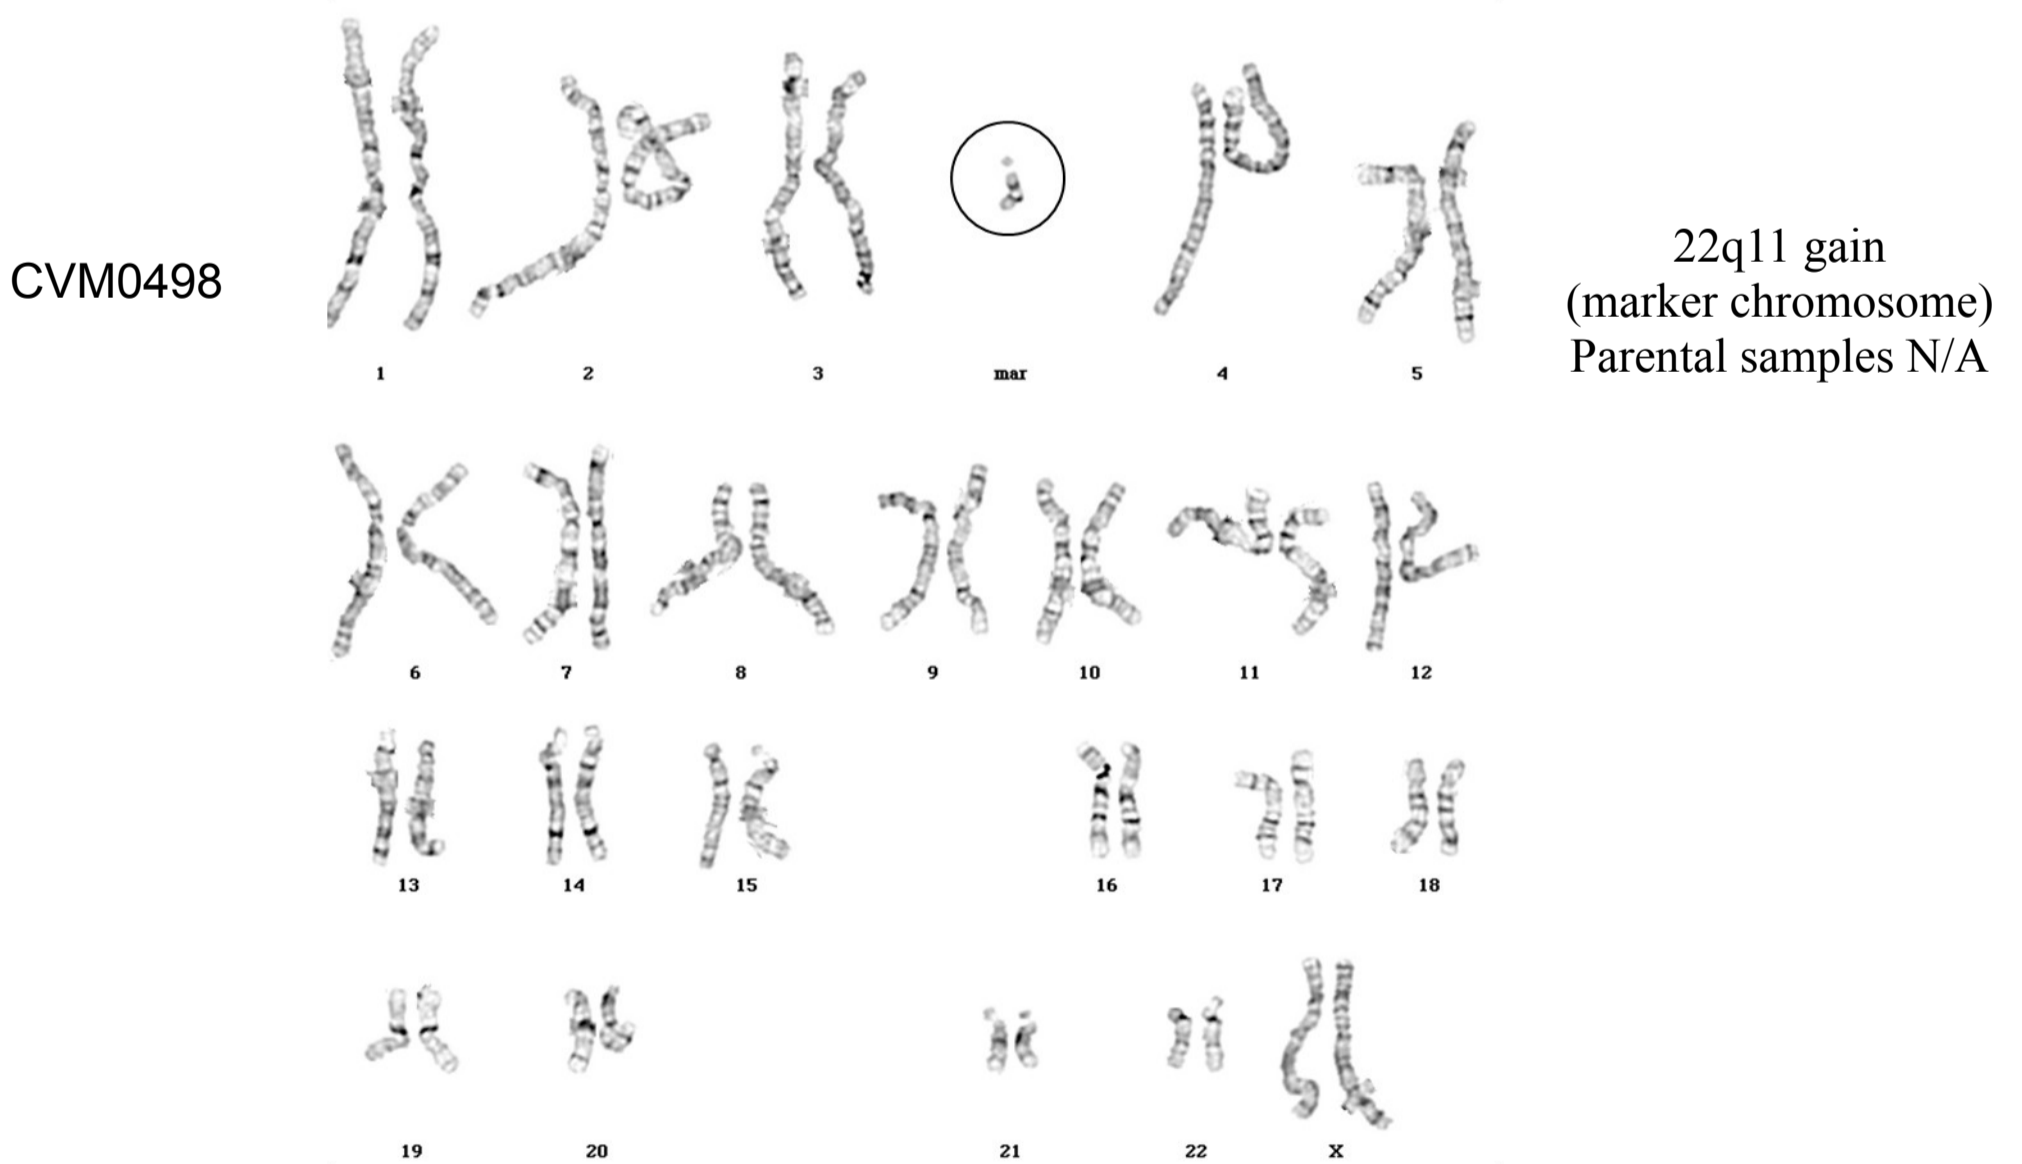

### **Supplementary figure 7**

Protein-protein interactions of the candidate proteins encoded within the enriched CNVs with 276 proteins specific for human cardiac development in the Human Protein Reference Database (HPRD). Subnetwork comprised of genes harbored by the enriched structural variants (blue) and annotated human cardiac genes (red). Connections in the network are determined by annotations documented in the HPRD. Note that the candidate proteins NEIL2 and PELP1, a corepressor of SRF directly interact with EP300, responsible for Rubinstein-Taybi syndrome. SOX7, a transcriptional factor directly interacts with SMAD7 and SMAD5. NKX2-5 and HAND2 regulate the expression of transcription factor GATA4 (represented in green, as in both categories). CAMTA2 acts as a coactivator of Nkx2-5 and the associated 17p13 variant is enriched in the CVM cohort. These results show that the genes within the enriched CNVs in this study encode proteins that directly interact with proteins implicated in human cardiac development.

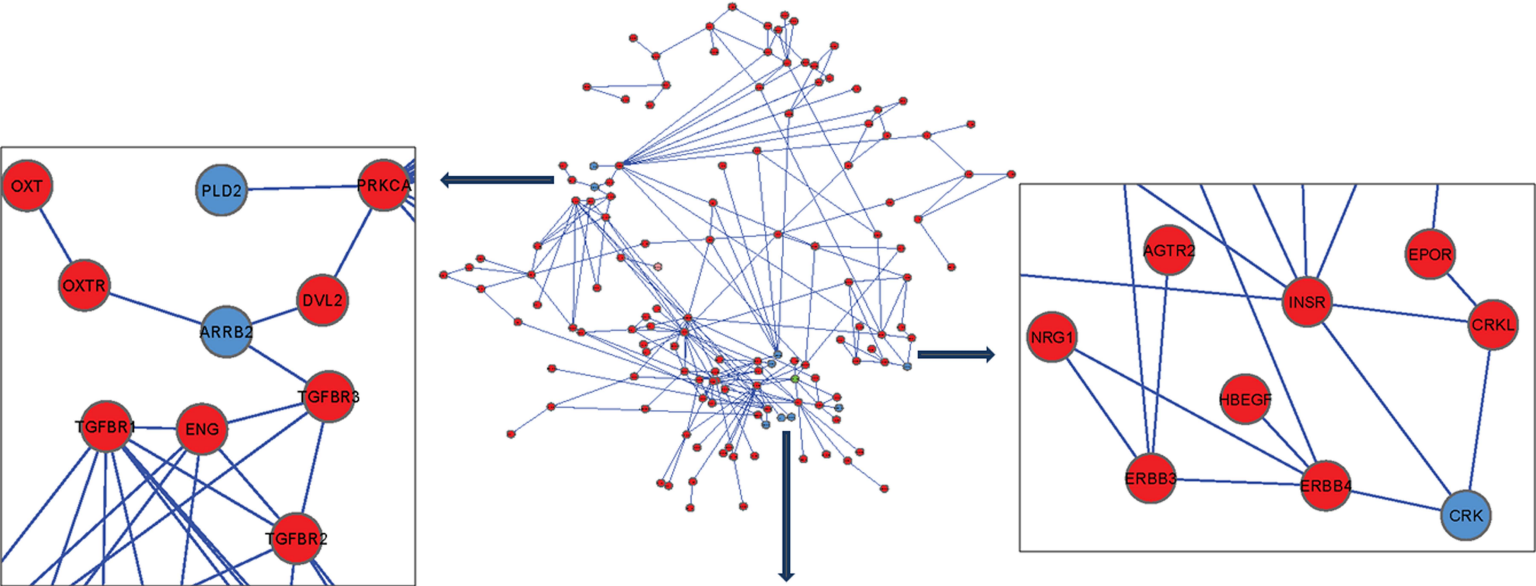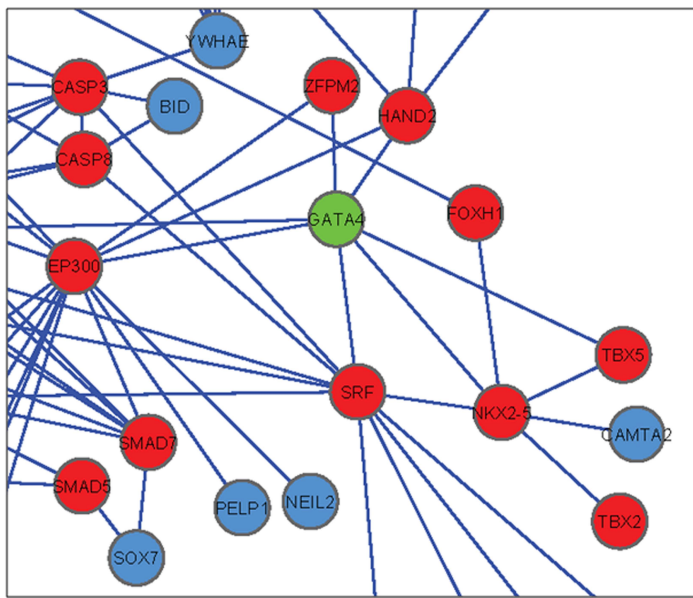

Supplementary figure 8

Haploinsufficiency scores for the genes within the 16 enriched structural variants

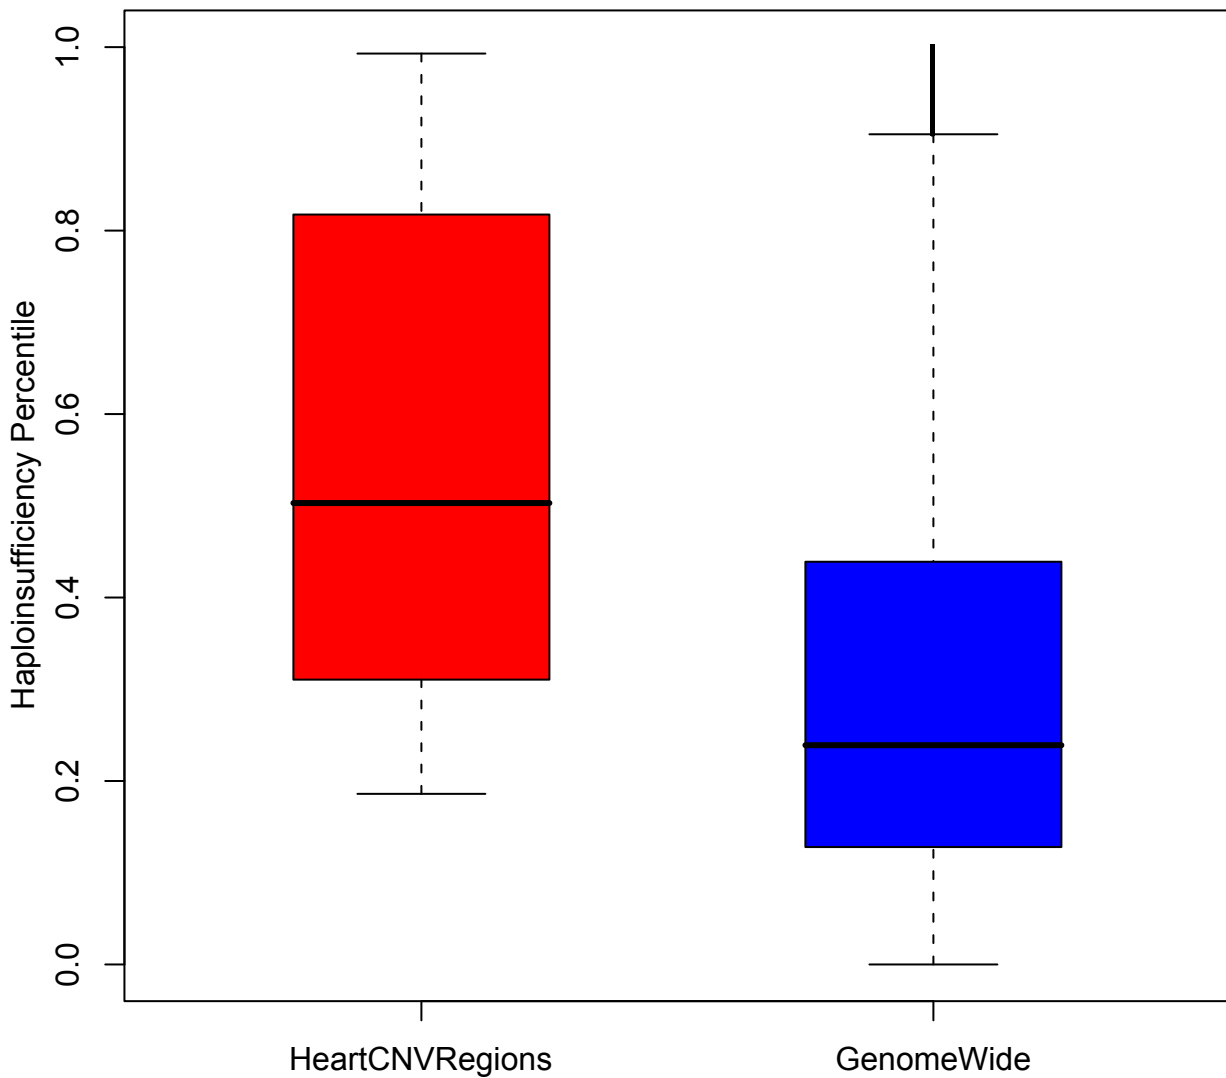

## Supplementary figure 9

**Monte Carlo analysis to determine the statistical significance of the number of direct interactions and size of the subnetwork of the candidate proteins with 276 human cardiac specific genes, using a random set of proteins with 10,000 simulations.** A subset of the candidate genes identified in the study, have direct interactions with the annotated human cardiac specific genes in the HPRD. The number of distinct genes directly connected to annotated human cardiac genes (A) was larger than would be expected by chance, with  $P = .0288$ . The total number of interactions (B) between the candidates and the annotated cardiac genes was also significant, with  $P = .0112$ . This protein interaction network analysis indicates that the genes within the enriched CNVs encode proteins that directly interact with proteins implicated in human cardiac development.



**A**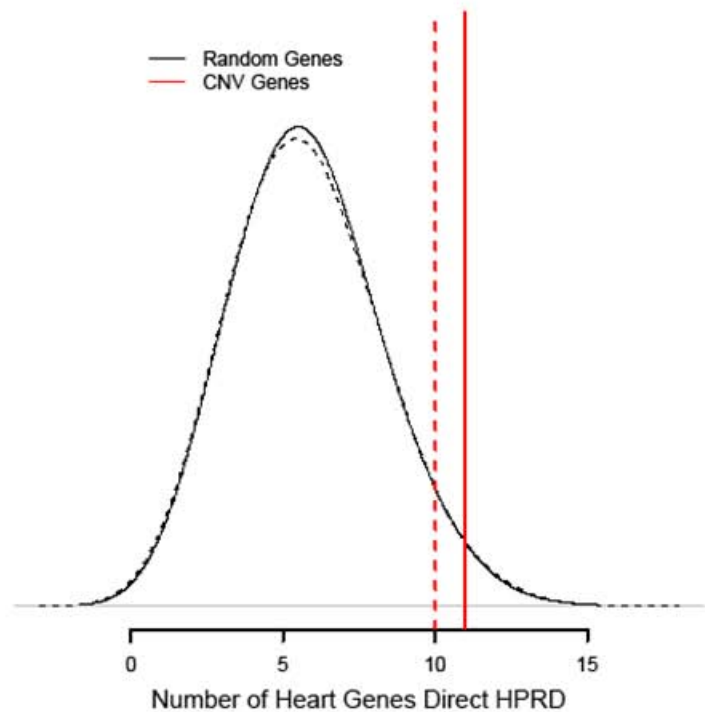**B**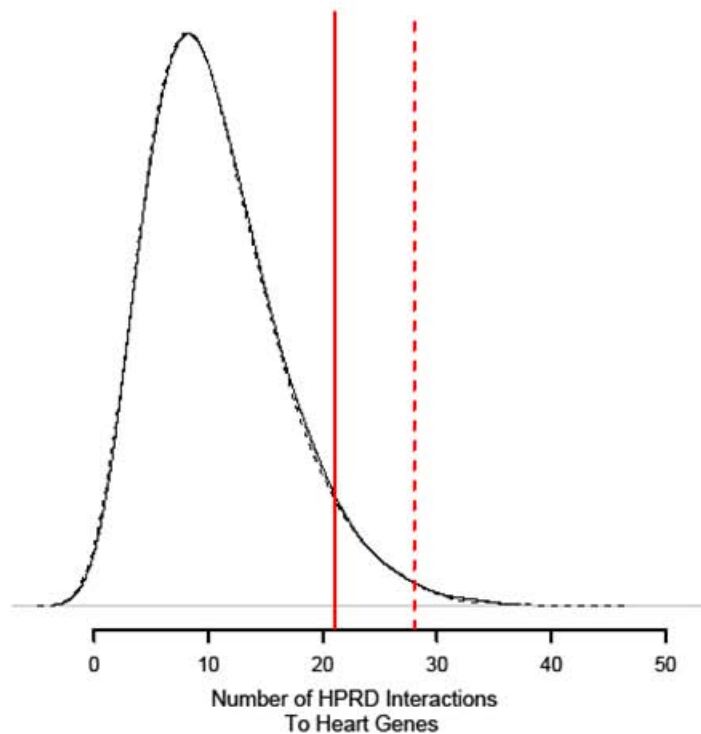

Supplement: ejhg2012155x1.pdf [file ejhg2012155x1.pdf]
